# Supplementary material
Source: publisher site journal article supplement (https://mbmg.pensoft.net/article/download/suppl/3929929/)
Supplement: Supplementary file 1

## Sheet: Table S1
Table S1. The numbers of sequence reads remained (filtered) in data processing steps
Sample name				Raw read # (fastq)	(1) Tail-trimming		(2) PE assembly		(3) N removal		(4-1) Length filtering (229±20 bp)		(5) Primers removal		% remained	Standard DNA reads	Reads of non-standard DNA, total	Reads of non-standard DNA, species name assinged	Species name assigned
	Sampling date	Sample/Negative control	Standard DNA added?	A	B	Diff.(A–B)	C	Diff. (B–C)	D	Diff. (D–C)	E	Diff. (D–E)	F	Diff. (E–F)	F/A×100	G	F–G	H	H/(F–G)×100
Sample01	2015-04-07	Sample	Y	40257	40257	0	39880	377	39880	0	39874	6	39811	63	0.988921	37965	1846	696	0.377031
Sample03	2015-04-14	Sample	Y	36935	36935	0	36620	315	36620	0	36608	12	36551	57	0.989603	34344	2207	1054	0.477571
Sample04	2015-04-21	Sample	Y	51959	51959	0	51463	496	51463	0	51449	14	51373	76	0.988722	47606	3767	2145	0.569419
Sample05	2015-04-28	Sample	Y	41237	41237	0	40923	314	40923	0	40909	14	40846	63	0.990518	38003	2843	1655	0.582132
Sample06	2015-05-05	Sample	Y	48185	48185	0	47636	549	47636	0	47617	19	47531	86	0.986427	43341	4190	2557	0.610263
Sample08	2015-05-12	Sample	Y	42824	42824	0	42385	439	42385	0	42377	8	42304	73	0.987857	39920	2384	844	0.354027
Sample09	2015-05-19	Sample	Y	24554	24554	0	24415	139	24415	0	24408	7	24377	31	0.992791	22972	1405	801	0.570107
Sample10	2015-05-26	Sample	Y	17189	17189	0	17069	120	17069	0	17059	10	17030	29	0.99075	15933	1097	640	0.583409
Sample11	2015-06-02	Sample	Y	21795	21795	0	21640	155	21640	0	21628	12	21594	34	0.990778	20226	1368	752	0.549708
Sample13	2015-06-08	Sample	Y	23715	23715	0	23564	151	23564	0	23549	15	23512	37	0.99144	22000	1512	902	0.596561
Sample14	2015-06-16	Sample	Y	18	18	0	17	1	17	0	17	0	17	0	0.944444	0	17	0	0
Sample15	2015-06-23	Sample	Y	5237	5237	0	5197	40	5197	0	5194	3	5184	10	0.98988	4252	932	754	0.809013
Sample16	2015-06-30	Sample	Y	5550	5550	0	5497	53	5497	0	5495	2	5490	5	0.989189	3543	1947	1724	0.885465
Sample17	2015-07-07	Sample	Y	4263	4263	0	4221	42	4221	0	4220	1	4215	5	0.98874	3906	309	158	0.511327
Sample19	2015-07-14	Sample	Y	10580	10580	0	10478	102	10478	0	10470	8	10453	17	0.987996	6439	4014	3611	0.899601
Sample20	2015-07-22	Sample	Y	28978	28978	0	28770	208	28770	0	28753	17	28701	52	0.990441	26511	2190	1451	0.662557
Sample21	2015-07-28	Sample	Y	37265	37265	0	36982	283	36982	0	36969	13	36904	65	0.990313	35282	1622	596	0.367448
Sample22	2015-08-04	Sample	Y	5335	5335	0	5280	55	5280	0	5278	2	5271	7	0.988004	4549	722	552	0.764543
Sample24	2015-08-11	Sample	Y	48619	48619	0	48161	458	48161	0	48145	16	48074	71	0.98879	39200	8874	7382	0.831868
Sample25	2015-08-18	Sample	Y	24876	24876	0	24660	216	24660	0	24647	13	24607	40	0.989186	22796	1811	1112	0.614025
Sample26	2015-08-25	Sample	Y	33842	33842	0	33511	331	33511	0	33494	17	33453	41	0.988505	8401	25052	23527	0.939127
Sample27	2015-09-01	Sample	Y	14156	14156	0	14043	113	14043	0	14033	10	14003	30	0.989192	13016	987	516	0.522796
Sample29	2015-09-08	Sample	Y	26823	26823	0	26584	239	26584	0	26554	30	26523	31	0.988816	23525	2998	2116	0.705804
Sample30	2015-09-15	Sample	Y	30790	30790	0	30509	281	30509	0	30487	22	30442	45	0.988698	29065	1377	490	0.355846
Sample31	2015-09-22	Sample	Y	24106	24106	0	23920	186	23920	0	23904	16	23868	36	0.990127	23020	848	148	0.174528
Sample32	2015-09-29	Sample	Y	154	154	0	147	7	147	0	147	0	147	0	0.954545	116	31	0	0
Sample33	2015-10-06	Sample	Y	24613	24613	0	24315	298	24315	0	24303	12	24266	37	0.985902	22412	1854	1147	0.618662
Sample35	2015-10-13	Sample	Y	24398	24398	0	23994	404	23994	0	23986	8	23941	45	0.981269	22805	1136	308	0.271127
Sample36	2015-10-20	Sample	Y	51	51	0	44	7	44	0	44	0	44	0	0.862745	23	21	0	0
Sample37	2015-10-27	Sample	Y	38017	38017	0	37581	436	37581	0	37567	14	37491	76	0.986164	35484	2007	810	0.403587
Sample38	2015-11-02	Sample	Y	48342	48342	0	47840	502	47840	0	47827	13	47742	85	0.987588	36443	11299	9348	0.82733
Sample40	2015-11-10	Sample	Y	5223	5223	0	5159	64	5159	0	5157	2	5149	8	0.985832	3432	1717	1470	0.856144
Sample41	2015-11-17	Sample	Y	33624	33624	0	33240	384	33240	0	33226	14	33169	57	0.986468	28276	4893	3879	0.792765
Sample42	2015-11-24	Sample	Y	36618	36618	0	36323	295	36323	0	36316	7	36258	58	0.990169	18844	17414	16243	0.932755
Sample43	2015-12-01	Sample	Y	32323	32323	0	31967	356	31967	0	31916	51	31860	56	0.985676	25396	6464	5434	0.840656
Sample45	2015-12-08	Sample	Y	38759	38759	0	38352	407	38352	0	38341	11	38283	58	0.987719	34383	3900	2674	0.685641
Sample46	2015-12-15	Sample	Y	51476	51476	0	51086	390	51086	0	51069	17	50995	74	0.990656	46495	4500	2989	0.664222
Sample47	2015-12-22	Sample	Y	33035	33035	0	32749	286	32749	0	32738	11	32684	54	0.989375	28544	4140	3166	0.764734
Sample48	2015-12-28	Sample	Y	35850	35850	0	35366	484	35366	0	35357	9	35291	66	0.984407	33856	1435	237	0.165157
Sample49	2016-01-05	Sample	Y	17068	17068	0	16874	194	16874	0	16864	10	16827	37	0.98588	15493	1334	827	0.61994
Sample51	2016-01-12	Sample	Y	22797	22797	0	22493	304	22493	0	22477	16	22434	43	0.984077	21068	1366	523	0.38287
Sample52	2016-01-19	Sample	Y	36960	36960	0	36548	412	36548	0	36533	15	36476	57	0.986905	33995	2481	1298	0.523176
Sample53	2016-01-26	Sample	Y	26184	26184	0	25862	322	25862	0	25849	13	25805	44	0.985526	24266	1539	756	0.491228
Sample54	2016-02-02	Sample	Y	31235	31235	0	30605	630	30605	0	30598	7	30543	55	0.977845	28575	1968	809	0.411077
Sample56	2016-02-09	Sample	Y	29294	29294	0	28822	472	28822	0	28815	7	28771	44	0.982147	25710	3061	1965	0.641947
Sample57	2016-02-16	Sample	Y	17544	17544	0	16937	607	16937	0	16931	6	16902	29	0.963406	16150	752	0	0
Sample58	2016-02-23	Sample	Y	31720	31720	0	31371	349	31371	0	31360	11	31304	56	0.986885	28813	2491	1463	0.587314
Sample59	2016-03-01	Sample	Y	25965	25965	0	25730	235	25730	0	25723	7	25694	29	0.989563	24575	1119	423	0.378016
Sample61	2016-03-08	Sample	Y	31837	31837	0	31563	274	31563	0	31550	13	31504	46	0.98954	28915	2589	1638	0.632677
Sample62	2016-03-15	Sample	Y	36033	36033	0	35241	792	35241	0	35228	13	35168	60	0.975994	31344	3824	2339	0.611663
Sample63	2016-03-22	Sample	Y	11050	11050	0	10925	125	10925	0	10920	5	10898	22	0.986244	7427	3471	3040	0.875828
Sample64	2016-03-29	Sample	Y	45057	45057	0	44457	600	44457	0	44444	13	44371	73	0.984775	41976	2395	893	0.37286
Sample02	2015/4/7	Negative control	Y	59	59	0	31	28	31	0	31	0	31	0	0.525424	0	31	0	0
Sample07	2015/5/5	Negative control	Y	136	136	0	88	48	88	0	88	0	88	0	0.647059	47	41	0	0
Sample12	2015/6/2	Negative control	Y	27195	27195	0	26969	226	26969	0	26932	37	26877	55	0.988307	25972	905	39	0.0430939
Sample18	2015/7/7	Negative control	Y	8470	8470	0	8386	84	8386	0	8361	25	8348	13	0.985596	8045	303	17	0.0561056
Sample23	2015/8/4	Negative control	Y	13783	13783	0	13628	155	13628	0	13588	40	13568	20	0.984401	13173	395	0	0
Sample28	2015/9/1	Negative control	Y	1380	1380	0	1329	51	1329	0	1319	10	1316	3	0.953623	1238	78	0	0
Sample34	201510/6	Negative control	Y	1717	1717	0	1645	72	1645	0	1639	6	1637	2	0.953407	1410	227	130	0.572687
Sample39	2015/11/2	Negative control	Y	26816	26816	0	26546	270	26546	0	26512	34	26450	62	0.986351	25370	1080	44	0.0407407
Sample44	2015/12/1	Negative control	Y	5833	5833	0	5714	119	5714	0	5685	29	5675	10	0.972913	5475	200	0	0
Sample50	2016/1/5	Negative control	Y	181	181	0	126	55	126	0	126	0	126	0	0.696133	84	42	0	0
Sample55	2016/2/2	Negative control	Y	1304	1304	0	1268	36	1268	0	1267	1	1267	0	0.971626	1128	139	25	0.179856
Sample60	2016/3/1	Negative control	Y	132	132	0	48	84	48	0	47	1	47	0	0.356061	21	26	0	0
Sample65	NA	Negative control	Y	6087	6087	0	5569	518	5569	0	5565	4	5554	11	0.912436	5305	249	0	0
Sample66	NA	Negative control	Y	12289	12289	0	11678	611	11678	0	11676	2	11665	11	0.949223	11207	458	0	0
Sample67	NA	Negative control	Y	11030	11030	0	10425	605	10425	0	10421	4	10397	24	0.942611	10055	342	0	0
Sample68	NA	Negative control	N	800	800	0	3	797	3	0	3	0	0	3	0	0	0	0	NA
Sample69	NA	Negative control	N	724	724	0	3	721	3	0	3	0	0	3	0	0	0	0	NA
Sample70	NA	Negative control	N	683	683	0	2	681	2	0	2	0	0	2	0	0	0	0	NA
Total				1532934	1532934	0	1512474	20460	1512474	0	1511689	785	1509197	2492	0.984515	1339161	170036	120117	0.706421
